# Supplementary material
Source: Springer Nature journal article supplement (https://www.springermedizin.de/resource/supplementary/13075_2010_9706_MOESM2_ESM.pdf/9693326)

**(a)**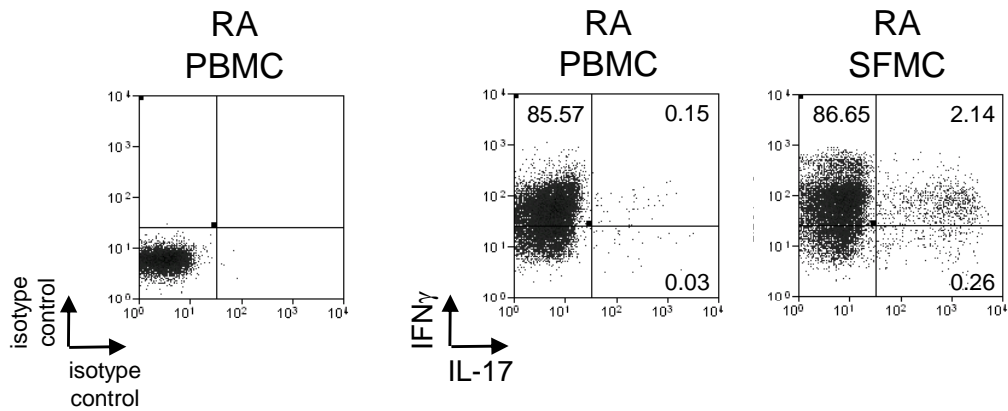**(b)**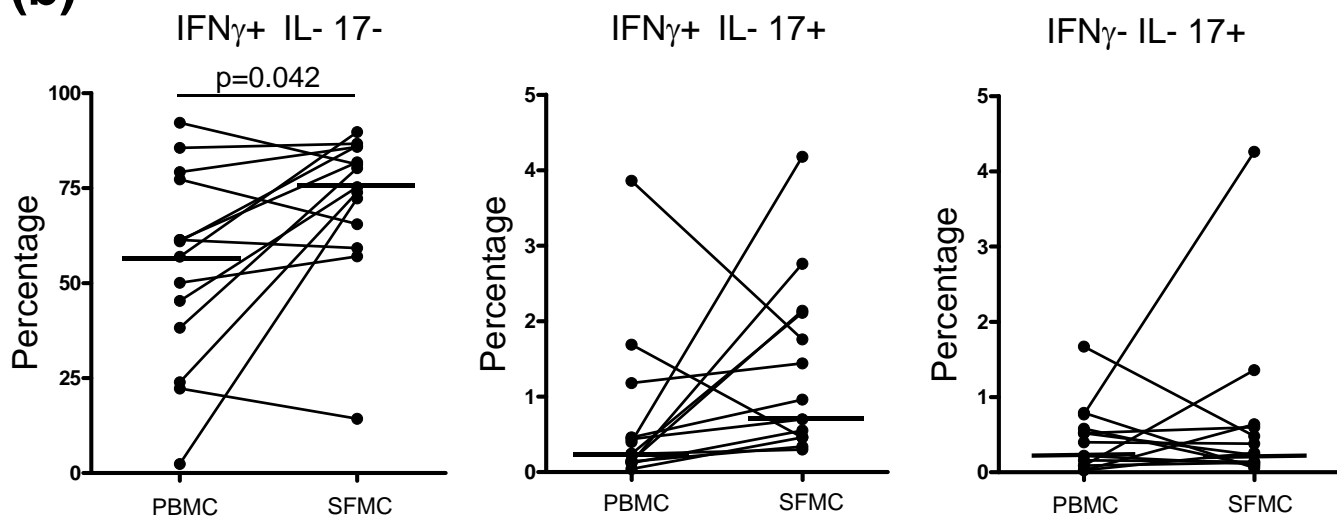**(c)**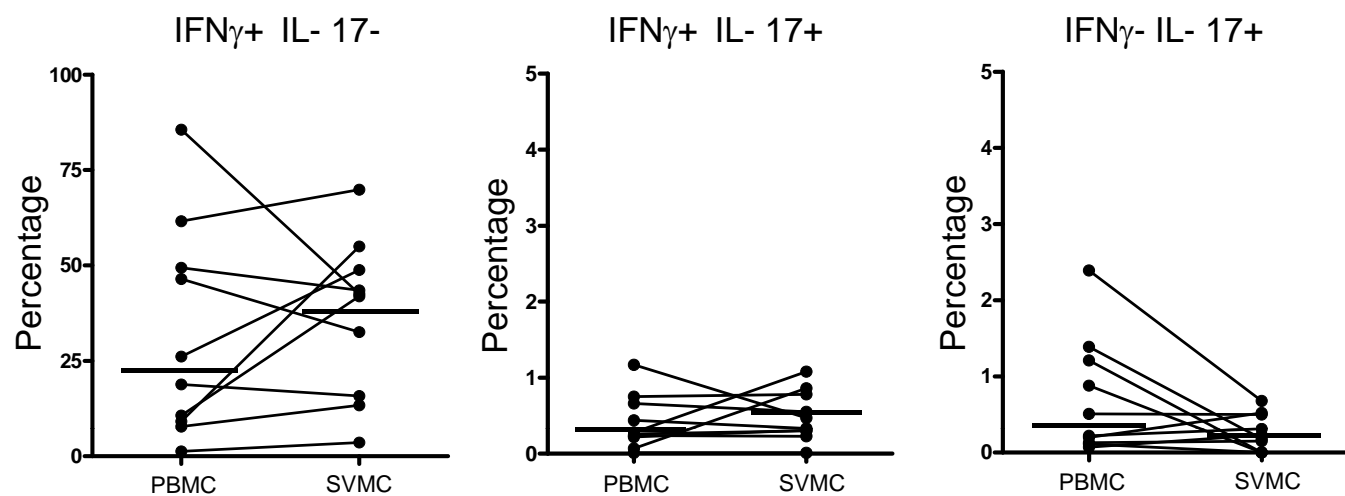

Supplement: MOESM2 [file 9693326]
